# Supplementary material
Source: publisher site journal article supplement (https://www.dovepress.com/article/353741)
Supplement: Supplementary file 1 [file get_supplementary_file.php]

**Table S1. Components of the Charlson Comorbidity Index (CCI)**

| Comorbidity | Point(s) |
| --- | --- |
| Age (years)  50-59  60-69  70-79  ≥80 | 1  2  3  4 |
| Solid tumor  Localized  Metastatic | 2  6 |
| Acquired immune deficiency syndrome | 6 |
| Diabetes mellitus  Uncomplicated  End-organ damage | 1  2 |
| Liver disease**a**  Mild  Moderate to severe | 1  3 |
| Moderate to severe chronic kidney disease**b** | 2 |
| Leukemia, lymphoma, hemiplegia | 2 each |
| History of myocardial infarction, chronic heart failure, peripheral vascular disease, cerebrovascular accident or transient ischemic attack, dementia, chronic obstructive pulmonary disease, connective tissue disease, peptic ulcer disease | 1 each |

**a** Mild: chronic hepatitis or cirrhosis without portal hypertension; moderate: cirrhosis and portal hypertension but no variceal bleeding history; severe: cirrhosis and portal hypertension with variceal bleeding history.

**b** Moderate: creatinine >3 mg/dL; severe: on dialysis; post kidney transplant or uremia.

**Table S2. Sequential Organ Failure Assessment (SOFA) Score**

| SOFA score | 1 | 2 | 3 | 4 |
| --- | --- | --- | --- | --- |
| Respiration  PaO2/FiO2,mmHg | <400 | <300 | < 200  with respiratory support | < 100  with respiratory support |
| Coagulation  Platelets x 10**3** /mm**3** | <150 | <100 | <50 | <20 |
| Liver  Bilirubin, mg/dL  (mmol/L) | 1.2-1.9  (20-32) | 2.0-5.9  (33-101) | 6.0-11.9  (102-204) | > 12.0  (> 204) |
| Cardiovascular  Hypotension**a** | MAP < 70 mmHg | Dopamine K 5 or  Dobutamine (any dose) | Dopamine < 5 or  epinephrine K 0.1 or  norepinephrine K 0.1 | Dopamine > 1.5 or epinephrine > 0.1 or norepinephrine > 0.1 |
| Central Nervous System  Glasgow coma score | 13-14 | 10-12 | 6-9 | <6 |
| Renal  Creatinine, mg/dL  (mmol/L) or urine output | 1.2-1.9  (110-170) | 2.0-3.4  (171-299) | 3.5-4.9  (300-440) or  < 500 mL/day | > 5.0  (> 440) or  < 200 mL/day |

**a** adrenergic agents administered for at least one hour (doses given are in mg/kg·min)

**Table S3. Component weights and bins for the Oxford Acute Severity of Illness Score (OASIS).**

| Variables | Score |
| --- | --- |
| Pre-ICU length of stay (hours) |  |
| <0.17 | 5 |
| 0.17-4.94 | 3 |
| 4.95-24.00 | 0 |
| 24.01-311.80 | 2 |
| >311.80 | 1 |
| Age (years) |  |
| <24 | 0 |
| 24-53 | 3 |
| 54-77 | 6 |
| 78-89 | 9 |
| ≥90 | 7 |
| Glasgow Coma Score |  |
| 3-7 | 10 |
| 8-13 | 4 |
| 14 | 3 |
| 15 | 0 |
| Heart rate (min-1) |  |
| <33 | 4 |
| 33-88 | 0 |
| 89-106 | 1 |
| 107-125 | 3 |
| >125 | 6 |
| Mean arterial pressure (mmHg) |  |
| <20.65 | 4 |
| 20.65-50.99 | 3 |
| 51-61.32 | 2 |
| 61.33-143.44 | 0 |
| >143.44 | 3 |
| Respiratory rate (min-1) |  |
| <6 | 10 |
| 6-12 | 1 |
| 13-22 | 0 |
| 23-30 | 1 |
| 31-44 | 6 |
| >44 | 9 |
| Temperature (℃) |  |
| <33.22 | 3 |
| 33.22-35.93 | 4 |
| 35.94-36.39 | 2 |
| 36.40-36.88 | 0 |
| 36.89-39.88 | 2 |
| >39.88 | 6 |
| Urine output (ml/day) |  |
| <671 | 10 |
| 671-1426.99 | 5 |
| 1427-2543.99 | 1 |
| 2544-6896 | 0 |
| >6896 | 8 |
| Ventilated |  |
| No | 0 |
| Yes | 9 |
| Elective Surgery |  |
| Yes | 0 |
| No | 6 |

**Table S4. Components of the Acute Physiology Score III(APS III).**

| Variables | Score | Variables |
| --- | --- | --- |
| Pulse (beats/min) | ≤39  40-49  50-99  100-109  110-119  120-139  140-154  ≥155 | 8  5  0  1  5  7  13  17 |
| Mean Blood Pressure (MAP) | ≤39  40-59  60-69  70-79  80-99  100-119  120-129  130-139  ≥140 | 23  15  7  6  0  4  7  9  10 |
| Temperature (degrees Centigrade) | ≤32.9  33-33.4  33.5-33.9  34-34.9  35-35.9  36-39.9  ≥40 | 20  16  13  8  2  0  4 |
| Respiratory Rate (breaths/min)  (for patients who are ventilated no points are given for respiratory rates of 6-12) | ≤5  6-11  12-13  14-24  25-34  35-39  40-49  ≥50 | 17  8  7  0  6  9  11  18 |
| PaO2 (mmHg) | ≤49  50-69  70-79  ≥80 | 15  5  2  0 |
| A-aDO2  (Only use A-aDO2 for intubated patients with FiO2 >=0.5 (50%). Do not use PaO2 weights for these patients.) | <100  100-249  250-349  350-499  ≥500 | 0  7  9  11  14 |
| Hematocrit (%) | ≤40.9  41-49  ≥50 | 3  0  3 |
| WBC (cu/mm) | <1.0  1.0-2.9  3.0-19.9  20-24.9  ≥25 | 19  5  0  1  5 |
| Creatinine without ARF(mg/dl) | ≤0.4  0.5-1.4  1.5-1.94  ≥1.95 | 3  0  4  7 |
| Creatinine with ARF (mg/dl)  (Acute Renal Failure (ARF) is defined as creatinine >=1.5 mg/dl as creatinine >=1.5 mg/dl and urine output <410 cc/day and no chronic dialysis) | 0-1.4  ≥1.5 | 0  10 |
| Urine Output (cc/day) | ≤399  400-599  600-899  900-1499  1500-1999  2000-3999  ≥4000 | 15  8  7  5  4  0  1 |
| BUN (mg/dl) | ≤16.9  17-19  20-39  40-79  ≥80 | 0  2  7  11  12 |
| Sodium (mEq/L) | ≤119  120-134  135-154  ≥155 | 3  2  0  4 |
| Albumin (g/dl) | ≤1.9  2.0-2.4  2.5-4.4  ≥4.5 | 11  6  0  4 |
| Bilirubin (mg/dl) | ≤1.9  2.0-2.9  3.0-4.9  5.0-7.9  ≥8.0 | 0  5  6  8  16 |
| Glucose (mg/dl)  (Glucose <=39 mg/dl is lower weight than 40-59) | ≤39  40-59  60-199  200-349  ≥350 | 8  9  0  3  5 |
| Acid-Base points (see below) |  |  |
| GCS points (see below) |  |  |

**Acid-Base Abnormalities**

| **PCO2**  **PH** | **<25** | **25~<30** | **30~<35** | **35~<40** | **40~<45** | **45~<50** | **50~<55** | **55~<60** | **≥60** |
| --- | --- | --- | --- | --- | --- | --- | --- | --- | --- |
| **<7.15** | **12** | | | | | | **4** | | |
| **7.15~<7.20** |
| **7.20~<7.25** | **9** | | **6** | | **3** | | **2** | | |
| **7.25~<7.30** |
| **7.30~<7.35** | **0** | | | **1** | | | |
| **7.35~<7.40** | **5** | | **1** | | | |
| **7.40~<7.45** |
| **7.45~<7.50** | **0** | **2** | | **12** | | | |
| **7.50~<7.55** |  | **3** | | |  |
| **7.55~<7.60** |
| **7.60~<7.65** | **0** |
| **≥7.65** |

**Neurological Abnormalities:**

**(1)Eyes open spontaneously or to painful/verbal stimulation**

| Verbal motor | oriented,converses | confused conversation | inappropriate words and incomprehensible sounds | no response |
| --- | --- | --- | --- | --- |
| obeys verbal command | 0 | 3 | 10 | 15 |
| localizes pain | 3 | 8 | 13 | 15 |
| Flexion withdrawal/decorticate rigidity | 3 | 13 | 24 | 24 |
| decerebrate rigidity/no response | 3 | 13 | 29 | 29 |

**(2)Eyes do not open spontaneously or to painful/verbal stimulation**

| Verbal motor | oriented,converses | confused conversation | inappropriate words and incomprehensible sounds | no response |
| --- | --- | --- | --- | --- |
| obeys verbal command |  |  |  | 16 |
| localizes pain |  |  |  | 16 |
| Flexion withdrawal/decorticate rigidity |  |  | 24 | 33 |
| decerebrate rigidity/no response |  |  | 29 | 48 |

**Table S5. Univariate Cox regression analysis of all patients on 1-year mortality and 3-years mortality**

| **Variables** | **1-year mortality** | | **3-years mortality** | |
| --- | --- | --- | --- | --- |
| **HR (95%CI)** | **P** | **HR (95%CI)** | **P** |
| Age | 1.027(1.021~1.033) | <0.001 | 1.027(1.021~1.032) | <0.001 |
| Gender, male | 1.036(0.912~1.177) | 0.585 | 1.036(0.917~1.170) | 0.567 |
| **Ethnicity** |  |  |  |  |
| Other | 1.0 (Ref) | - | 1.0 (Ref) | - |
| White | 0.630(0.541~0.735) | <0.001 | 0.680(0.585~0.790) | <0.001 |
| Black | 0.631(0.475~0.837) | <0.001 | 0.717(0.550~0.937) | 0.015 |
| Hispanic | 0.645(0.394~1.057) | 0.082 | 0.743(0.470~1.173) | 0.202 |
| Asian | 1.202(0.768~1.881) | 0.420 | 1.239(0.800~1.919) | 0.338 |
| **Insurance type** |  |  |  |  |
| Other | 1.0 (Ref) | - | 1.0 (Ref) | - |
| Medicaid | 0.862(0.612~1.214) | 0.395 | 0.853(0.611~1.190) | 0.349 |
| Medicare | 1.347(1.172~1.549) | <0.001 | 1.402(1.225~1.604) | <0.001 |
| **Vitals** | | | |  |
| Temperature | 0.823(0.751~0.902) | <0.001 | 0.827(0.758~0.904) | <0.001 |
| HR | 1.013(1.010~1.016) | <0.001 | 1.012(1.009~1.015) | <0.001 |
| RR | 1.042(1.032~1.053) | <0.001 | 1.041(1.031~1.052) | <0.001 |
| MAP | 0.995(0.991~0.998) | <0.01 | 0.995(0.991~0.998) | <0.01 |
| SpO2 | 0.952(0.937~0.967) | <0.001 | 0.955(0.940~0.969) | <0.001 |
| **Comorbidities** | | | |  |
| Asthma | 0.809(0.566~1.157) | 0.246 | 0.864(0.619~1.204) | 0.387 |
| Pneumonia |  |  |  |  |
| Bacterial pneumonia | 1371(1.107~1.698) | <0.01 | 1.345(1.093~1.654) | <0.01 |
| viral pneumonia | 0.837(0.434~1.613) | 0.595 | 0.855(0.459~1.594) | 0.622 |
| Ventilator-associated pneumonia | 1.998(1.553~2.570) | <0.001 | 1.875(1.462~2.407) | <0.001 |
| Hypertension | 0.689(0.603~0.787) | <0.001 | 0.711(0.626~0.807) | <0.001 |
| Diabetes | 0.974(0.843~1.126) | 0.725 | 1.007(0.878~1.156) | 0.916 |
| Myocardial infarction | 1.175(1.017~1.358) | 0.028 | 1.187(1.034~1.363) | 0.015 |
| Congestive heart failure | 1.289(1.136~1.463) | <0.001 | 1.324(1.173~1.495) | <0.001 |
| Cerebrovascular disease | 1.237(1.048~1.461) | 0.012 | 1.149(0.976~1.354) | 0.095 |
| Renal disease | 1.576(1.380~1.799) | <0.001 | 1.570(1.382~1.783) | <0.001 |
| Liver disease | 1.890(1.619~2.205) | <0.001 | 1.835(1.580~2.131) | <0.001 |
| Malignant cancer | 1.844(1.591~2.138) | <0.001 | 1.781(1.543~2.055) | <0.001 |
| **Laboratory events** | | | |  |
| Potassium | 1.268(1.154~1.393) | <0.001 | 1.253(1.145~1.371) | <0.001 |
| Bicarbonate | 0.972(0.960~0.984) | <0.001 | 0.974(0.963~0.986) | <0.001 |
| Glucose | 1.002(1.001~1.004) | <0.001 | 1.002(1.001~1.003) | <0.001 |
| WBC | 1.038(1.026~1.049) | <0.001 | 1.033(1.022~1.044) | <0.001 |
| HGB | 0.989(0.986~0.992) | <0.001 | 0.989(0.987~0.992) | <0.001 |
| Platelet | 0.999(0.999~1.000) | 0.051 | 0.999(0.999~1.000) | 0.070 |
| **Treatment** | | | |  |
| Glucocorticoid treatment | 0.722(0.635~0.820) | <0.001 | 0.755(0.669~0.853) | <0.001 |
| Bronchodilator treatment | 0.976(0.825~1.154) | 0.774 | 0.956(0.815~1.122) | 0.581 |
| Antibiotic treatment | 2.108(1.695~2.621) | <0.001 | 1.920(1.571~2.347) | <0.001 |
| Diuretic | 1.038(0.913~1.180) | 0.567 | 1.040(0.920~1.175) | 0.530 |
| Vasopressin | 5.170(4.498~5.943) | <0.001 | 4.760(4.153~5.457) | <0.001 |
| Mechanical ventilation |  |  |  |  |
| Non-invasive | 0.971(0.765~1.233) | 0.809 | 0.938(0.744~1.183) | 0.588 |
| Invasive | 2.145(1.886~2.441) | <0.001 | 1.953(1.727~2.207) | <0.001 |
| **Scores** | | | |  |
| CCI | 1.172(1.146~1.198) | <0.001 | 1.167(1.142~1.192) | <0.001 |
| SOFA | 1.137(1.105~1.171) | <0.001 | 1.129(1.098~1.161) | <0.001 |
| APSIII | 1.040(1.037~1.042) | <0.001 | 1.037(1.035~1.040) | <0.001 |
| OASIS | 1.083(1.076~1.090) | <0.001 | 1.076(1.070~1.083) | <0.001 |

Hazard ratio (HR) and 95% CI (95%CI) for serum sodium in 1-year mortality and 3-years mortality were calculated using univariate Cox regression models. **Abbreviation:** HR: heart rate; RR: respiratory rate; MAP: mean arterial pressure; SpO2: pulse oximetry-derived oxygen saturation; WBC: white blood cell count; HGB: hemoglobin; CCI: Charlson comorbidity Index; SOFA: sequential organ failure assessment; APSIII: acute physiology score III; OASIS: oxford acute severity of illness score.

**Table S6. Subgroup analysis for the effect of serum sodium on 1-year mortality in COPD patients.**

| **Subgroups** | **N** | **Control group** | **Hyponatremia group** | **P** | **Hypernatremia group** | **P** | **p for interaction** |
| --- | --- | --- | --- | --- | --- | --- | --- |
| **Ref** | **HR (95%CI)** | **HR (95%CI)** |
| Age |  |  |  |  |  |  |  |
| <72 | 2702 | 1 | 1.749(1.390~2.201) | <0.001 | 1.186(0.699~2.012) | 0.527 | <0.05 |
| ≥72 | 2838 | 1 | 1.415(1.152~1.737) | <0.001 | 2.007(1.517~2.655) | <0.001 |
| Gender |  |  |  |  |  |  |  |
| Male | 2984 | 1 | 1.717(1400~2.105) | <0.001 | 2.081(1.455~2.976) | <0.001 | 0.768 |
| Female | 2556 | 1 | 1.420(1.127~1.789) | <0.01 | 1.435(1.020~2.020) | <0.05 |
| COPD |  |  |  |  |  |  |  |
| AECOPD | 1165 | 1 | 1.515(1.078~2.131) | <0.05 | 1.117(0.677~2.131) | 0.665 | 0.139 |
| Non-AECOPD | 4375 | 1 | 1.558(1.313~1.848) | <0.001 | 1.922(1.448~2.552) | <0.001 |
| Asthma |  |  |  |  |  |  |  |
| Yes | 215 | 1 | 2.239(0.952~5.267) | 0.065 | 1.486(0.245~8.996) | 0.667 | 0.302 |
| No | 5325 | 1 | 1.530(1.310~1.787) | <0.001 | 1.700(1.326~2.180) | <0.001 |
| Bacterial pneumonia |  |  |  |  |  |  |  |
| Yes | 403 | 1 | 1.643(0.977~2.762) | 0.061 | 2.073(1.016~4.228) | <0.05 | 0.690 |
| No | 5137 | 1 | 1.542(1.315~1.809) | <0.001 | 1.640(1.258~2.139) | <0.001 |
| Ventilator associated pneumonia |  |  |  |  |  |  |  |
| Yes | 202 | 1 | 1.312(0.712~2.417) | 0.384 | 1.603(0.505~5.085) | 0.423 | 0.146 |
| No | 5338 | 1 | 1.597(1.365~1.869) | <0.001 | 1.693(1.315~2.179) | <0.001 |
| Hypertension |  |  |  |  |  |  |  |
| Yes | 2367 | 1 | 1.495(1.153~1.938) | <0.01 | 1.872(1.230~2.849) | <0.01 | 0.439 |
| No | 3173 | 1 | 1.610(1.333~1.944) | <0.001 | 1.591(1.173~2.158) | <0.05 |
| Diabetes |  |  |  |  |  |  |  |
| Yes | 1461 | 1 | 1.437(1.068~1.933) | <0.05 | 1.224(0.689~2.172) | 0.490 | 0.553 |
| No | 4079 | 1 | 1.574(1.317~1.881) | <0.001 | 1.825(1.387~2.401) | <0.001 |
| Myocardial infarction |  |  |  |  |  |  |  |
| Yes | 1289 | 1 | 1.592(1.188~2.133) | <0.01 | 1.482(0.896~2.450) | 0.125 | 0.777 |
| No | 4251 | 1 | 1.552(1.298~1.856) | <0.001 | 1.724(1.298~1.856) | <0.001 |
| Congestive heart failure |  |  |  |  |  |  |  |
| Yes | 2493 | 1 | 1.564(1.262~1.938) | <0.001 | 1.310(0.914~1.878) | 0.141 | 0.277 |
| No | 3047 | 1 | 1.576(1.268~1.959) | <0.001 | 2.228(1.585~3.134) | <0.001 |
| Cerebrovascular disease |  |  |  |  |  |  |  |
| Yes | 825 | 1 | 1.293(0.845~1.977) | 0.236 | 1.271(0.716~2.256) | 0.412 | 0.654 |
| No | 4715 | 1 | 1.618(1.373~1.907) | <0.001 | 1.779(1.352~2.341) | <0.001 |
| Renal disease |  |  |  |  |  |  |  |
| Yes | 1456 | 1 | 1.597(1.229~2.075) | <0.001 | 1.528(1.021~2.288) | <0.05 | 0.960 |
| No | 4084 | 1 | 1.559(1.293~1.880) | <0.001 | 1.766(1.293~2.412) | <0.001 |
| Liver disease |  |  |  |  |  |  |  |
| Yes | 740 | 1 | 1.938(1.423~2.639) | <0.001 | 1.495(0.862~2.591) | 0.152 | 0.053 |
| No | 4800 | 1 | 1.420(1.187~1.699) | <0.001 | 1.736(1.316~2.289) | <0.001 |
| Malignant cancer |  |  |  |  |  |  |  |
| Yes | 866 | 1 | 1.672(1.246~2.243) | <0.001 | 1.971(1.047~3.709) | <0.05 | 0.967 |
| No | 4674 | 1 | 1.535(1.285~1.834) | <0.001 | 1.574(1.204~2.058) | <0.001 |

Hazard ratio (HR) and 95% CI (95%CI) of serum sodium level for 1-years mortality in subgroups were calculated by Cox hazard regression models. Model adjusted for age, gender, race and insurance status, SOFA score, glucocorticoid use, vasopressin use, invasive mechanical ventilation use, bacterial pneumonia, ventilator associated pneumonia, hypertension, myocardial infarction, congestive heart failure, renal disease, liver disease and malignant cancer, namely model II described above. **Abbreviation:** AECOPD: acute exacerbation of chronic obstructive pulmonary disease.

**Table S7. Association of hyponatremia with 1-year mortality and 3-years mortality**

| **Variables** | **Crude model** | **P** | **Model 1** | **P** | **Model 2** | **P** |
| --- | --- | --- | --- | --- | --- | --- |
| **HR (95%CI)** | **HR (95%CI)** | **HR (95%CI)** |
| **1-year mortality** | | | | | | |
| Control group  135≤Na≤145 | 1.0 (Ref) | - | 1.0 (Ref) | - | 1.0 (Ref) | - |
| Hyponatremia group  Na<135 | 1.620(1.396~1.882) | <0.001 | 1.693(1.457~1.966) | <0.001 | 1.550(1.332~1.804) | <0.001 |
| Mild-hyponatraemia  130≤Na<135 | 1.550(1.294~1.857) | <0.001 | 1.612(1.353~1.943) | <0.001 | 1.490(1.242~1.788) | <0.001 |
| Moderate-hyponatraemia  125≤Na<130 | 1.685(1.299~2.187) | <0.001 | 1.715(1.320~2.228) | <0.001 | 1.519(1.162~1..986) | <0.01 |
| Profound-hyponatraemia  Na<125 | 1.904(1.304~2.779) | <0.001 | 2.111(1.445~3.085) | <0.001 | 2.085(1.423~3.057) | <0.001 |
| P for trend | <0.001 |  | <0.001 |  | <0.001 |  |
| **3-years mortality** | | | | | | |
| Control group  135≤Na≤145 | 1.0 (Ref) |  | 1.0 (Ref) |  | 1.0 (Ref) |  |
| Hyponatremia group  Na<135 | 1.569(1.359~1.813) | <0.001 | 1.640(1.419~1.895) | <0.001 | 1.506(1.301~1.743) | <0.001 |
| Mild-hyponatraemia  130≤Na<135 | 1.468(1.231~1.750) | <0.001 | 1.534(1.286~1.830) | <0.001 | 1.419(1.188~1.695) | <0.001 |
| Moderate-hyponatraemia  125≤Na<130 | 1.686(1.315~2.162) | <0.001 | 1.723(1.342~2.213) | <0.001 | 1.521(1.178~1.963) | <0.001 |
| Profound-hyponatraemia  Na<125 | 1.919(1.340~2.750) | <0.001 | 2.129(1.484~3.052) | <0.001 | 2.097(1.458~3.015) | <0.001 |
| P for trend | <0.001 |  | <0.001 |  | <0.001 |  |

Hazard ratio and 95% CI for serum sodium in 1-year mortality and 3-years mortality were calculated using different Cox regression models. Crude model included only the serum sodium data; Model I adjusted for age, gender, race and insurance status; Model II adjusted for model I plus SOFA score, glucocorticoid use, vasopressin use, invasive mechanical ventilation use, bacterial pneumonia, ventilator associated pneumonia, hypertension, myocardial infarction, congestive heart failure, renal disease, liver disease and malignant cancer.

**A**

**
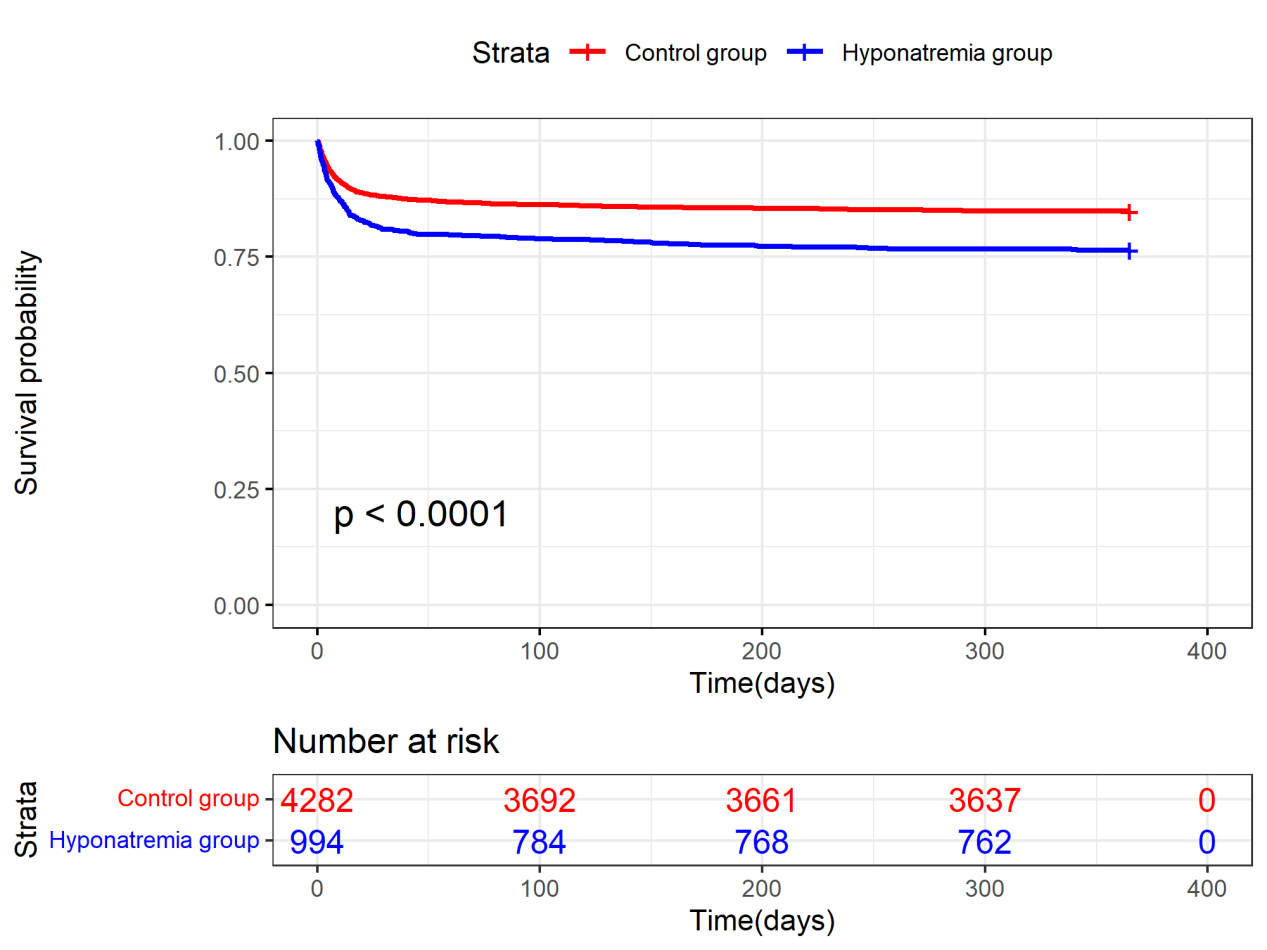
**

**B**

**
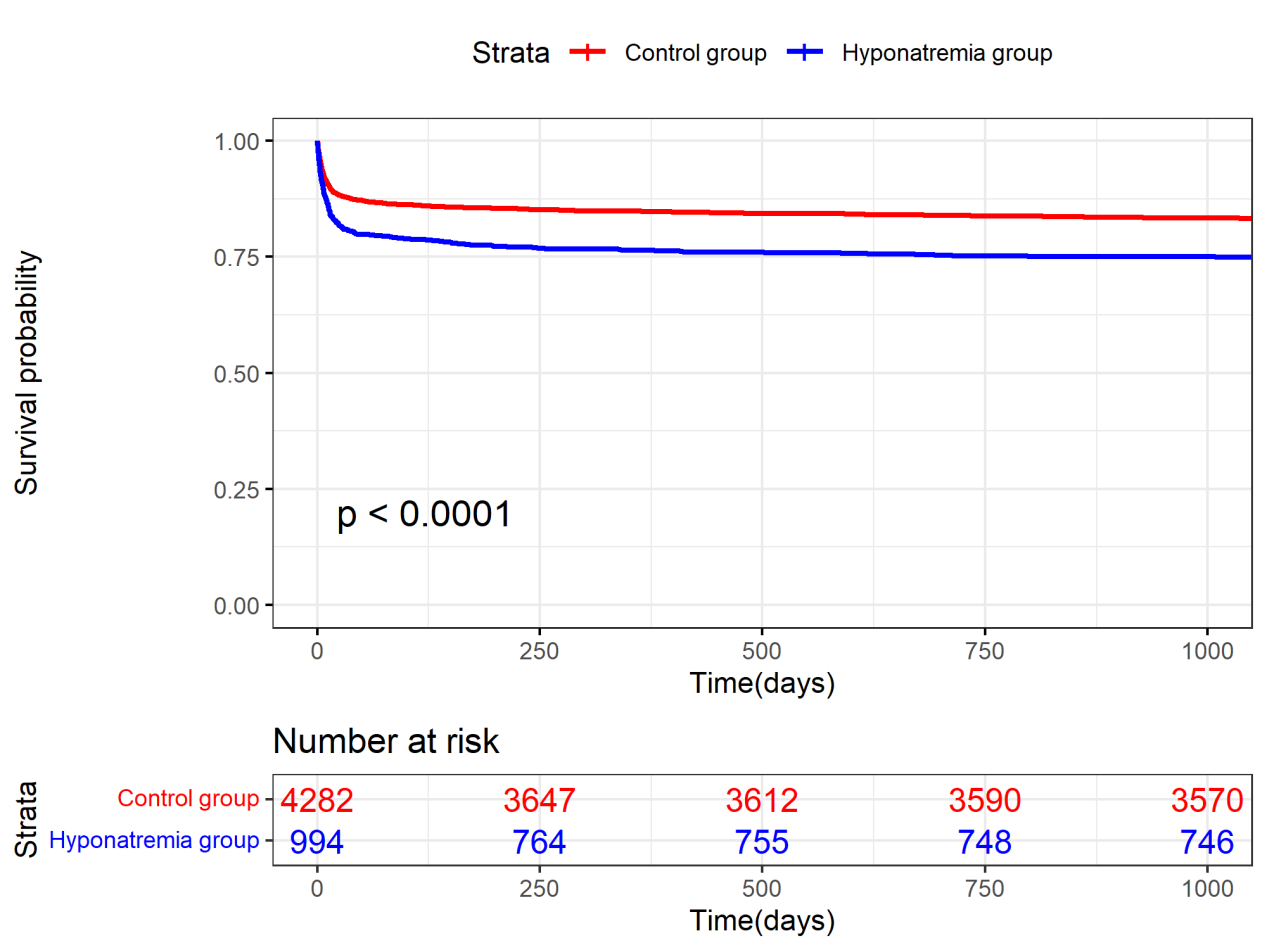
**

**C**

**
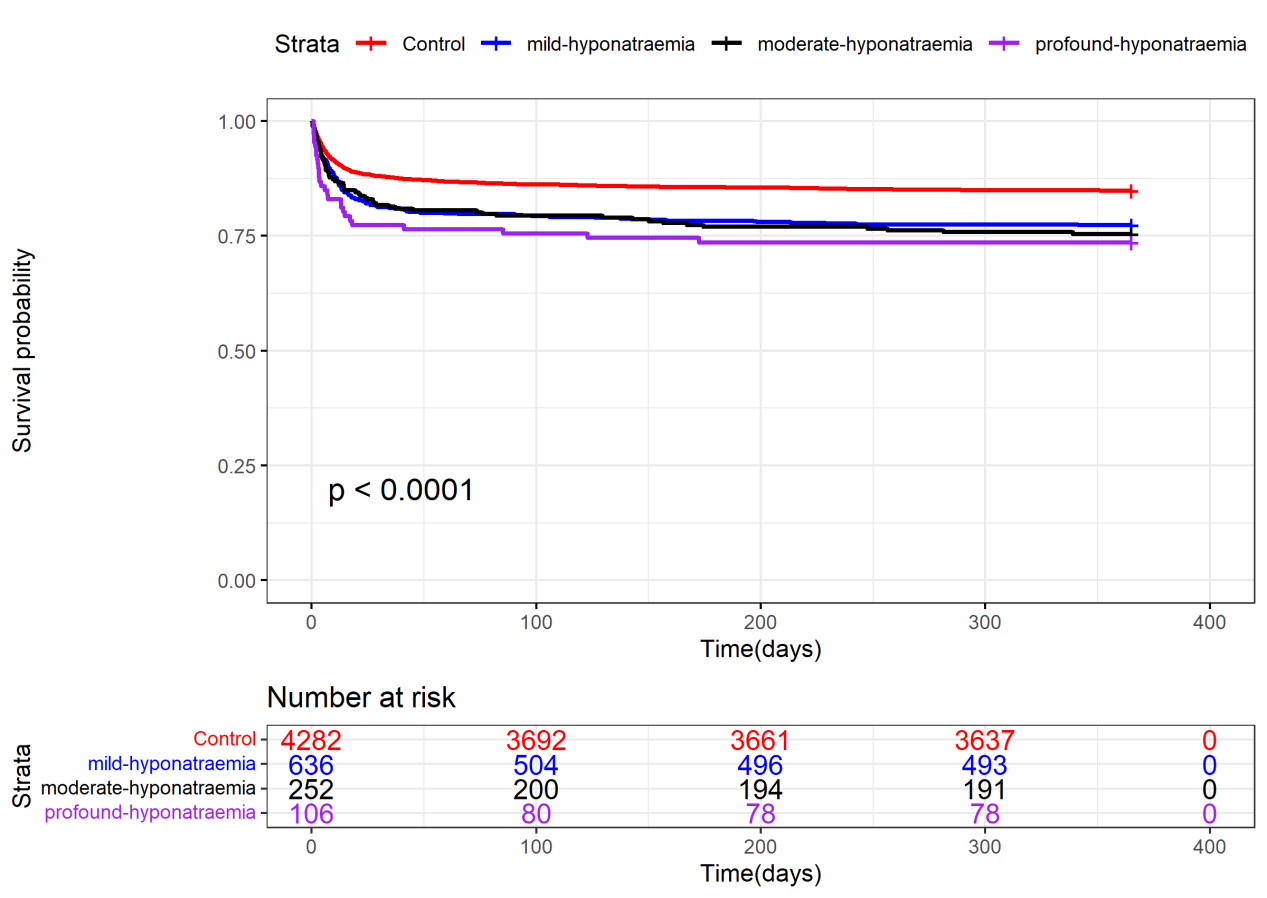
**

**D**

**
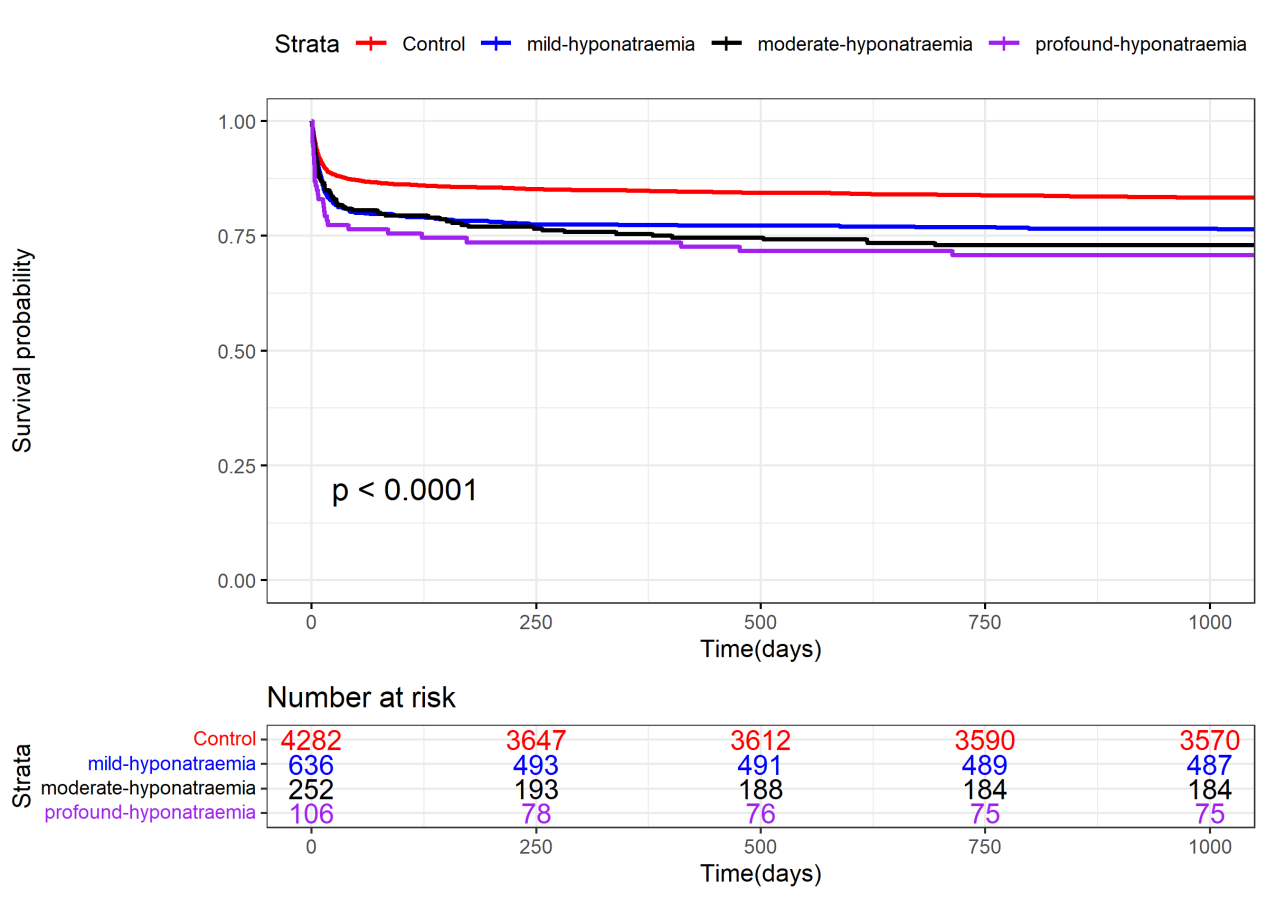
**

**Figure S1** Kaplan-Meier survival curves showing the association between the serum sodium and all-cause mortality: (A,C) 1-year mortality; (B,D) 3-years mortality. (A,B): The red line represents control group (135-145mmol/L); the blue line represents hyponatremia group (<135mmol/L); (C,D): The red line represents control group (135-145mmol/L); the blue line represents mild-hyponatremia group (130-135mmol/L); the black line represents moderate-hyponatremia group (125-130mmol/L); the purple line represents profound-hyponatremia group (125-130mmol/L).
